# Supplementary material for: A Meta-Analysis to Estimate Prevalence of Resistance to Tetracyclines and Third Generation Cephalosporins in Enterobacteriaceae Isolated from Food Crops
Source: MDPI journal article supplement (doi:10.3390/antibiotics11101424), 2022-10-17
Supplement: s1 [file s1]

## Supplementary Materials

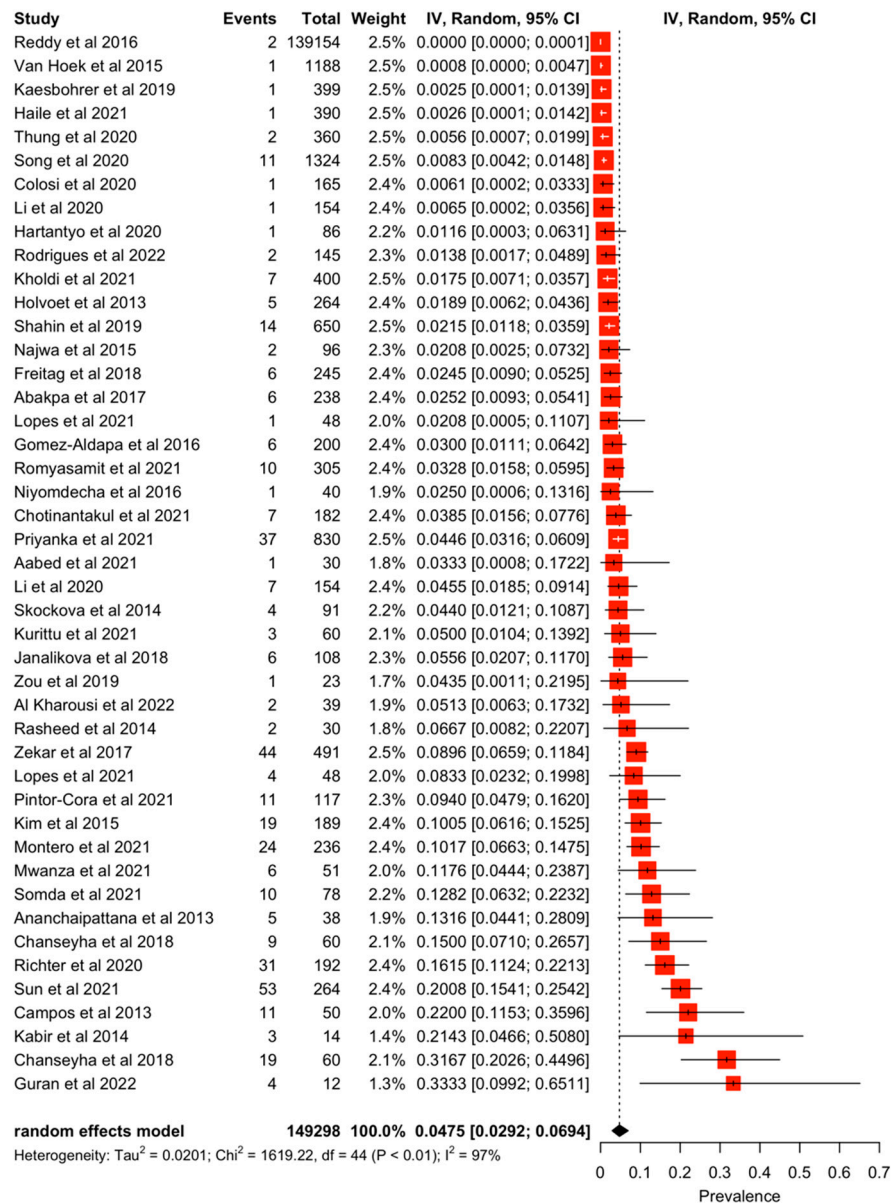

Figure S1: Forest Plot of Citations with Tetracycline and Third-Generation Cephalosporin Resistant Prevalence Estimates. The column titled 'Events' are the number of plant-food samples that were reported resistant to tetracycline and/or third-generation cephalosporin antimicrobials. The column titled 'Total' are the number of plant-food samples selected for antimicrobial susceptibility testing.

Table S1: Table of Included Citations.

| Study                         | Country                | Sample                                                                                                                                 | Stage        | Microbe name            | Sample weight (g) | Interpretive Criteria   | AMR | Resistant Samples | Total Samples | Prevalence (%) |
|-------------------------------|------------------------|----------------------------------------------------------------------------------------------------------------------------------------|--------------|-------------------------|-------------------|-------------------------|-----|-------------------|---------------|----------------|
| Reddy <i>et al.</i> 2016      | USA (imported)         | green onion, lettuce                                                                                                                   | Post-harvest | <i>Salmonella</i> spp.  | NA                | Not reported            | TET | 2                 | 139,154       | 0.001          |
| van Hoek <i>et al.</i> 2016   | Netherlands (imported) | celery, carrots, lettuce, endive, radish                                                                                               | Post-harvest | Enterobacteria ceae     | 60                | CLSI (2012)             | 3GC | 1                 | 1,188         | 0.1            |
| Kaesbohrer <i>et al.</i> 2019 | Germany                | vegetables                                                                                                                             | Post-harvest | <i>Escherichia coli</i> | 25                | CLSI (2013)             | 3GC | 1                 | 399           | 0.25           |
| Haile <i>et al.</i> 2021      | Ethiopia               | lettuce                                                                                                                                | Post-harvest | <i>Escherichia coli</i> | 25                | CLSI (2014)             | TET | 1                 | 390           | 0.25           |
| Thung <i>et al.</i> 2020      | Malaysia               | brinjal, cucumber, ladies fingers                                                                                                      | Pre-harvest  | <i>Salmonella</i> spp.  | 25                | CLSI (2012)             | TET | 2                 | 360           | 0.56           |
| Song <i>et al.</i> 2020       | South Korea            | leafy vegetables                                                                                                                       | Post-harvest | <i>Escherichia coli</i> | 30                | CLSI (no year reported) | 3GC | 11                | 1,324         | 0.83           |
| Colosi <i>et al.</i> 2020     | Romania                | cucumbers                                                                                                                              | Post-harvest | <i>Escherichia coli</i> | 2                 | EUCAST                  | 3GC | 1                 | 165           | 0.6            |
| Li et al 2020                 | China                  | bok choy, broccoli, bean sprout, celery, lotus root, cabbage, cucumber, clery, garlic sprout, leafy veg, chinese cabbage, black fungus | Post-harvest | <i>Escherichia coli</i> | 25                | EUCAST (2017)           | 3GC | 1                 | 154           | 0.006          |

|                                 |                                          |                                                                                   |              |                                                        |     |                          |     |    |     |      |
|---------------------------------|------------------------------------------|-----------------------------------------------------------------------------------|--------------|--------------------------------------------------------|-----|--------------------------|-----|----|-----|------|
| Hartantyo <i>et al.</i> 2020    | Singapore                                | bean sprouts, spring onions, chilis, parsley, lettuce, cucumbers, carrots, ginger | Post-harvest | <i>Klebsiella pneumonia</i>                            | 10  | CLSI (2014)              | 3GC | 1  | 86  | 1.2  |
| Rodrigues <i>et al.</i> 2022    | Denmark, Ireland, Italy, France, Austria | salad leaf samples                                                                | Post-harvest | <i>Klebsiella pneumonia</i>                            | NA  | EUCAST                   | TET | 2  | 145 | 1.37 |
| Kholdi <i>et al.</i> 2022       | Iran                                     | carrots, lettuce, cucumber, leafy greens                                          | Post-harvest | <i>Escherichia coli</i>                                | 25  | CLSI (2017)              | 3GC | 7  | 400 | 1.75 |
| Holvoet <i>et al.</i> 2013      | Belgium                                  | lettuce                                                                           | Pre-harvest  | <i>Escherichia coli</i>                                | 10  | CLSI (2011)              | TET | 5  | 264 | 1.9  |
| Shahin <i>et al.</i> 2019       | Iran                                     | vegetables                                                                        | Post-harvest | <i>Shigella</i> spp.                                   | 10  | CLSI (2015)              | TET | 14 | 650 | 2.2  |
| Najwa <i>et al.</i> 2015        | Malaysia                                 | ulam (asian pennywort, water dropwort, long bean, winged bean)                    | Post-harvest | <i>Salmonella</i> spp.                                 | 10  | CLSI                     | TET | 2  | 96  | 2    |
| Freitag <i>et al.</i> 2018      | Germany, Netherlands                     | salad and sprouts                                                                 | Post-harvest | <i>Escherichia coli</i>                                | 25  | CLSI (2013, 2015)        | TET | 6  | 245 | 2    |
| Abakpa <i>et al.</i> 2017       | Nigeria                                  | salad vegetables                                                                  | Pre-harvest  | <i>Escherichia coli</i>                                | 10  | CLSI (2010)              | TET | 6  | 238 | 2.5  |
| Lopes <i>et al.</i> 2021        | Brazil                                   | spinach, lettuce, arugula, cabbage                                                | Post-harvest | <i>Escherichia coli</i> ; <i>Klebsiella pneumoniae</i> | 4   | CLSI (2018, 2020)/EUCAST | TET | 1  | 48  | 2.1  |
| Gomez-Aldapa <i>et al.</i> 2016 | Mexico                                   | nopalitos                                                                         | Post-harvest | <i>Escherichia coli</i>                                | 100 | CLSI (2009, 2014)        | TET | 6  | 200 | 3    |

|                                  |              |                                                                                                                                                 |                  |                                                                    |    |                            |              |    |     |     |
|----------------------------------|--------------|-------------------------------------------------------------------------------------------------------------------------------------------------|------------------|--------------------------------------------------------------------|----|----------------------------|--------------|----|-----|-----|
| Romyasamit<br><i>et al.</i> 2021 | Thailand     | Thai yardlong<br>beans, Thai<br>eggplant,<br>winged bean,<br>cashew leaves,<br>basil, cabbage,<br>cucumber,<br>tomato,<br>coriander,<br>lettuce | Post-<br>harvest | <i>Escherichia coli</i> ;<br><i>Klebsiella</i><br><i>pneumonia</i> | 25 | CLSI (2019)                | TET &<br>3GC | 10 | 305 | 3.3 |
| Niyomdech<br><i>et al.</i> 2016  | Thailand     | lettuce                                                                                                                                         | Post-<br>harvest | <i>Salmonella</i> spp.                                             | 50 | CLSI (2013)                | TET          | 1  | 40  | 2.5 |
| Chotinanta<br><i>et al.</i> 2022 | Thailand     | spring onion,<br>sweet basil,<br>cha-om,<br>lemongrass,<br>yard long<br>beans, lettuce,<br>holy basil                                           | Post-<br>harvest | <i>Escherichia coli</i>                                            | 20 | CLSI (2019)                | 3GC          | 7  | 182 | 3.8 |
| Priyanka <i>et al.</i> 2021      | India        | cabbage,<br>coriander,<br>fenugreek,<br>spinach,<br>peppermint<br>vegetables                                                                    | Post-<br>harvest | <i>Salmonella</i> spp.                                             | 25 | CLSI (no year<br>reported) | TET &<br>3GC | 37 | 830 | 4.5 |
| Aabed <i>et al.</i> 2021         | Saudi-Arabia | vegetables                                                                                                                                      | Post-<br>harvest | <i>Escherichia coli</i>                                            | 10 | CLSI (no year<br>reported) | 3GC          | 1  | 30  | 3.3 |
| Li <i>et al.</i> 2020            | China        | bok choy,<br>broccoli, bean<br>sprout, celery,<br>lotus root,<br>cabbage,<br>cucumber,<br>clery, garlic<br>sprout, leafy<br>veg, chinese        | Post-<br>harvest | <i>Escherichia coli</i>                                            | 25 | EUCAST<br>(2017)           | TET          | 7  | 154 | 4.5 |

|                                |                           |                                                                                                                                                       |              |                                                                                          |    |                               |     |    |     |      |
|--------------------------------|---------------------------|-------------------------------------------------------------------------------------------------------------------------------------------------------|--------------|------------------------------------------------------------------------------------------|----|-------------------------------|-----|----|-----|------|
| Skockova <i>et al.</i> 2013    | Czech Republic (imported) | cabbage, black fungus<br>asparagus, leaf lettuce,<br>cauliflower, cucumber,<br>spring onion, mung sprouts,<br>rucola, leek, radish chinese<br>cabbage | Post-harvest | <i>Escherichia coli</i>                                                                  | NA | CLSI (2006)                   | TET | 4  | 91  | 4.4  |
| Kurittu <i>et al.</i> 2021     | Malaysia                  | Coriander; chili pepper                                                                                                                               | Post-harvest | <i>Escherichia coli</i> ;<br><i>Klebsiella pneumonia</i>                                 | 25 | EUCAST (2017)                 | 3GC | 3  | 60  | 5    |
| Janalikova <i>et al.</i> 2018  | Europe                    | vegetables                                                                                                                                            | Post-harvest | <i>Escherichia coli</i>                                                                  | 10 | EUCAST (2014)                 | 3GC | 6  | 108 | 5.5  |
| Zou <i>et al.</i> 2019         | China                     | beans, cucumber, peppers,<br>celery, leeks                                                                                                            | Pre-harvest  | <i>Escherichia coli</i>                                                                  | NA | CLSI (2016)                   | TET | 1  | 23  | 4.3  |
| Al-Kharousi <i>et al.</i> 2021 | Oman                      | cabbage, lettuce, radish                                                                                                                              | Post-harvest | <i>Escherichia coli</i>                                                                  | 25 | CLSI (2015)                   | TET | 2  | 39  | 5.1  |
| Rasheed <i>et al.</i> 2014     | India                     | carrots, cucumber, tomatoes,<br>spinach, lettuce, beets,<br>radishes                                                                                  | Post-harvest | <i>Escherichia coli</i>                                                                  | 25 | CLSI (2002)                   | 3GC | 2  | 30  | 6.67 |
| Zekar <i>et al.</i> 2017       | Algeria                   | mixed vegetables                                                                                                                                      | Post-harvest | Enterobacteria<br>ceae                                                                   | 25 | CLSI (2013);<br>EUCAST (2013) | 3GC | 44 | 491 | 8.96 |
| Lopes <i>et al.</i> 2021       | Brazil                    | spinach, lettuce, arugula,<br>cabbage                                                                                                                 | Post-harvest | <i>Enterobacter cloaca</i> ;<br><i>Klebsiella pneumonia</i> ;<br><i>Escherichia coli</i> | 4  | CLSI (2018, 2020)/EUCAST      | 3GC | 4  | 48  | 8.3  |

|                                           |              |                                                                         |                  |                                                                     |    |                                  |              |    |     |      |
|-------------------------------------------|--------------|-------------------------------------------------------------------------|------------------|---------------------------------------------------------------------|----|----------------------------------|--------------|----|-----|------|
| Pintor-Cora<br><i>et al.</i> 2021         | Spain        | carrot,<br>coriander,<br>escarole,<br>lettuce,<br>parsley,<br>tomato    |                  | Enterobacteria<br>ceae*                                             | 10 | EUCAST                           | 3GC          | 11 | 117 | 9.4  |
| Kim <i>et al.</i><br>2015                 | South-Korea  | sprouts and<br>salad                                                    | Post-<br>harvest | <i>Escherichia coli</i> ;<br><i>Klebsiella</i><br><i>pneumonia</i>  | 25 | CLSI (2013)                      | 3GC          | 19 | 189 | 10.1 |
| Montero <i>et al.</i> 2021                | Ecuador      | vegetables and<br>fruit                                                 | Pre-<br>harvest  | <i>Escherichia coli</i>                                             | 10 | CLSI (2019)                      | TET          | 24 | 236 | 10.2 |
| Mwanza <i>et al.</i> 2021                 | Tanzania     | African<br>spinach                                                      | Pre-<br>harvest  | <i>Escherichia coli</i>                                             | 10 | CLSI (2013)                      | TET;<br>3GC  | 6  | 51  | 11.8 |
| Somda <i>et al.</i> 2021                  | Burkina-Faso | lettuce                                                                 | Pre-<br>harvest  | <i>Salmonella</i> spp.                                              | NA | EUCAST<br>(2017)                 | TET          | 10 | 78  | 12.8 |
| Ananchaipat<br>tana <i>et al.</i><br>2014 | Thailand     | leafy<br>vegetables                                                     | Post-<br>harvest | <i>Salmonella</i> spp.                                              | 25 | CLSI (no year<br>reported)       | TET          | 5  | 38  | 13.2 |
| Chanseyha <i>et al.</i> 2018              | Cambodia     | green leaf<br>lettuce                                                   | Post-<br>harvest | <i>Escherichia coli</i> ;<br><i>Salmonella</i> spp.                 | 25 | CLSI (2013)                      | TET          | 9  | 60  | 15   |
| Richter <i>et al.</i> 2020                | South-Africa | cucumber,<br>green beans,<br>lettuce,<br>spinach,<br>tomatoes           | Post-<br>harvest | <i>Escherichia coli</i> ;<br><i>Klebsiella</i><br><i>pneumoniae</i> | 50 | CLSI (2018)                      | TET &<br>3GC | 31 | 192 | 16.1 |
| Sun <i>et al.</i> 2021                    | China        | onion,<br>coriander,<br>lettuce,<br>cucumber,<br>melon, grape,<br>peach | Post-<br>harvest | <i>Escherichia coli</i>                                             | 25 | CLSI<br>(2019)/EUCAS<br>T (2019) | TET          | 53 | 264 | 20.1 |
| Campos <i>et al.</i> 2013                 | Portugal     | ready-to-eat<br>salads                                                  | Post-<br>harvest | <i>Escherichia coli</i>                                             | 25 | CLSI (2011)                      | TET          | 11 | 50  | 22   |
| Kabir <i>et al.</i> 2014                  | Bangladesh   | cabbage,<br>carrot, turnip                                              | Post-<br>harvest | <i>Escherichia coli</i>                                             | 10 | CLSI (2011)                      | 3GC          | 3  | 14  | 21.4 |

|                                 |          |                                   |                  |                                                     |    |                  |     |    |    |      |
|---------------------------------|----------|-----------------------------------|------------------|-----------------------------------------------------|----|------------------|-----|----|----|------|
| Chanseyha<br><i>et al.</i> 2018 | Thailand | green leaf<br>lettuce             | Post-<br>harvest | <i>Escherichia coli</i> ;<br><i>Salmonella</i> spp. | 25 | CLSI (2013)      | TET | 19 | 60 | 31.2 |
| Guran et al<br>2021             | Cyprus   | banana, apple,<br>lettuce, carrot | Post-<br>harvest | <i>Escherichia coli</i>                             | 40 | EUCAST<br>(2015) | TET | 4  | 12 | 33.3 |

\*The authors of Pintor-Cora *et al.* 2021 used the final taxonomic definition of Enterobacteriaceae prior to recent revision to the families within the order Enterobacterales.
